# Supplementary figures and images for: Climate change may lead to the inability of millions of people to afford a healthy diet
Source: Research Square preprint supplement (doi:10.21203/rs.3.rs-4785366/v1), 2024-08-09

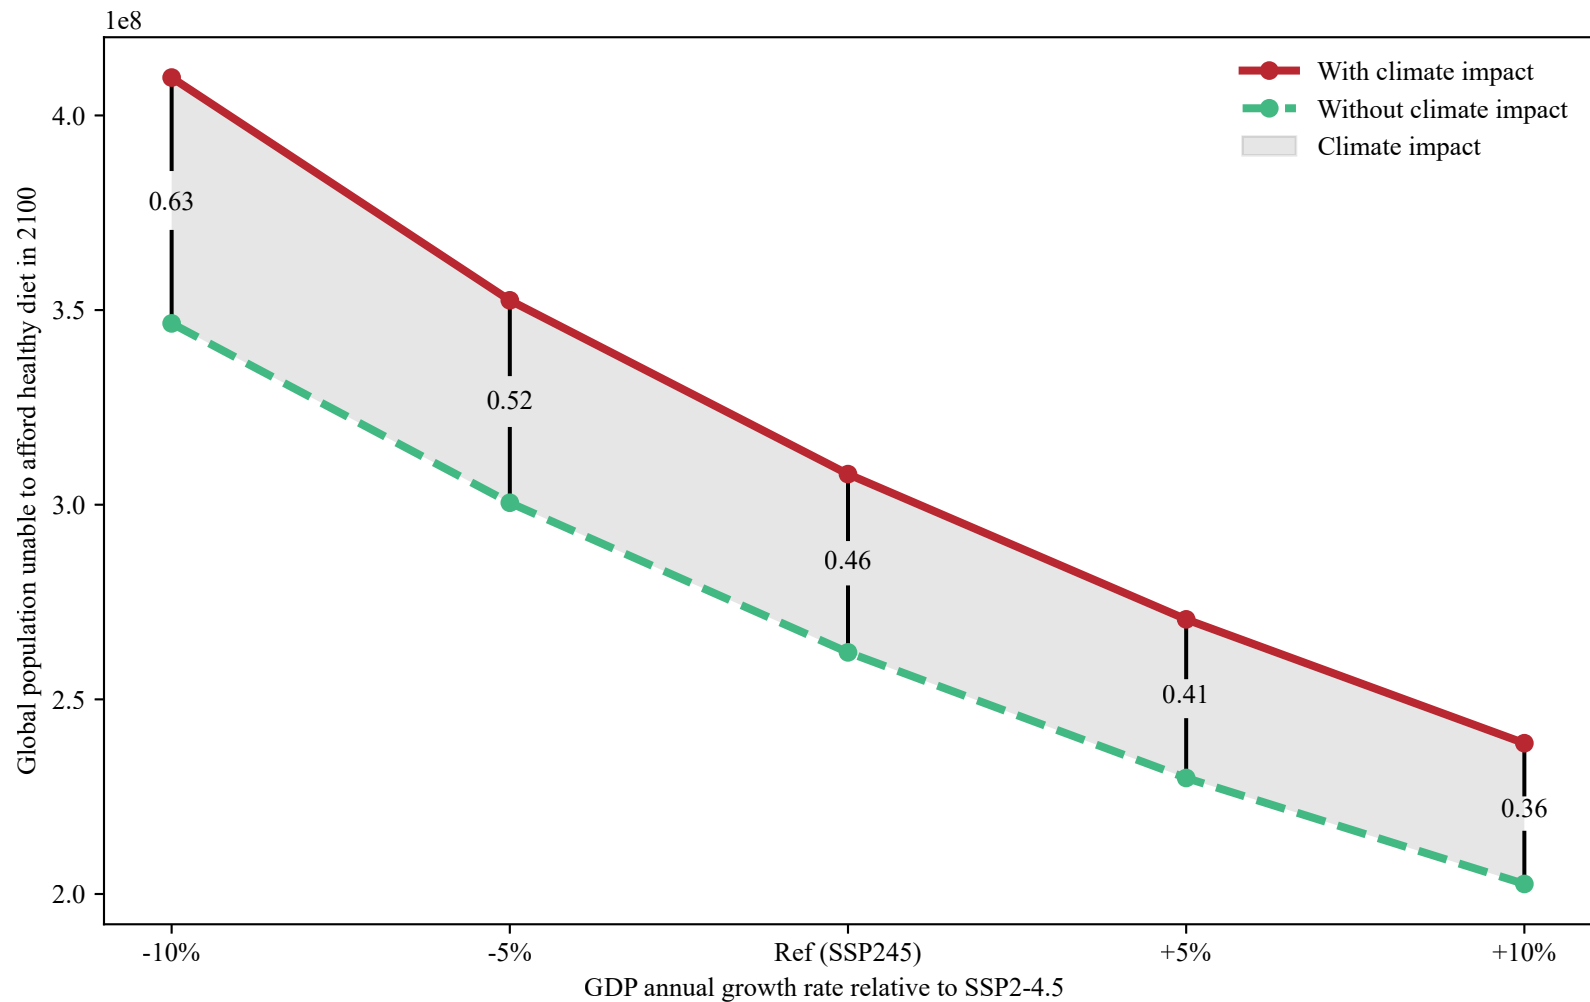

Supplement: Supplementary file 1 [file 56bfa48fb256c219fc217f35.pdf]
